# Supplementary material
Source: PubMed Central journal article supplement (PMC6276936)
Supplement: supp_6.4.E551_2018-0058-1-at.pdf [file supp_6.4.E551_2018-0058-1-at.pdf]

Appendix 1 (as supplied by the authors). Provincial, Territorial and Federal health ministries in Canada

| Jurisdiction                                   | Health ministry                                                       | Website                                                                                                                                                                                                                                                                                                                             |
|------------------------------------------------|-----------------------------------------------------------------------|-------------------------------------------------------------------------------------------------------------------------------------------------------------------------------------------------------------------------------------------------------------------------------------------------------------------------------------|
| <b>Federal*</b>                                |                                                                       |                                                                                                                                                                                                                                                                                                                                     |
| Non-Insured Health Benefit Program             | First Nations and Inuit Health                                        | <a href="https://www.canada.ca/en/indigenous-services-canada/services/non-insured-health-benefits-first-nations-inuit.html">https://www.canada.ca/en/indigenous-services-canada/services/non-insured-health-benefits-first-nations-inuit.html</a>                                                                                   |
| Interim Federal Health Program                 | Interim Federal Health Program                                        | <a href="https://www.canada.ca/en/immigration-refugees-citizenship/services/refugees/help-within-canada/health-care/interim-federal-health-program/eligibility.html">https://www.canada.ca/en/immigration-refugees-citizenship/services/refugees/help-within-canada/health-care/interim-federal-health-program/eligibility.html</a> |
| Veteran Affairs Canada                         | Veteran Affairs Canada                                                | <a href="http://www.veterans.gc.ca/eng/services/health/treatment-benefits">http://www.veterans.gc.ca/eng/services/health/treatment-benefits</a>                                                                                                                                                                                     |
| Correctional Service Canada                    | Correctional Service Canada Health Services                           | <a href="http://www.csc-scc.gc.ca/health/index-eng.shtml">http://www.csc-scc.gc.ca/health/index-eng.shtml</a>                                                                                                                                                                                                                       |
| National Defence and the Canadian Armed Forces | Canadian Forces Health Services                                       | <a href="http://www.forces.gc.ca/en/caf-community-health-services/index.page">http://www.forces.gc.ca/en/caf-community-health-services/index.page</a>                                                                                                                                                                               |
| <b>Province/Territory</b>                      |                                                                       |                                                                                                                                                                                                                                                                                                                                     |
| Alberta                                        | Alberta Health                                                        | <a href="http://www.health.alberta.ca/">www.health.alberta.ca/</a>                                                                                                                                                                                                                                                                  |
| British Columbia                               | British Columbia Ministry of Health                                   | <a href="http://www2.gov.bc.ca/gov/content/health">www2.gov.bc.ca/gov/content/health</a>                                                                                                                                                                                                                                            |
| Manitoba                                       | Manitoba Health, Seniors and Active Living                            | <a href="https://www.gov.mb.ca/health/index.html">https://www.gov.mb.ca/health/index.html</a>                                                                                                                                                                                                                                       |
| New Brunswick                                  | New Brunswick Department of Health                                    | <a href="https://www2.gnb.ca/content/gnb/en/departments/health.html">https://www2.gnb.ca/content/gnb/en/departments/health.html</a>                                                                                                                                                                                                 |
| Newfoundland and Labrador                      | Newfoundland and Labrador Department of Health and Community Services | <a href="https://www.gov.nl.ca/health-and-wellness/">https://www.gov.nl.ca/health-and-wellness/</a>                                                                                                                                                                                                                                 |
| Northwest Territories                          | Northwest Territories Health and Social Services                      | <a href="https://www.hss.gov.nt.ca/en">https://www.hss.gov.nt.ca/en</a>                                                                                                                                                                                                                                                             |
| Nova Scotia                                    | Nova Scotia Department of Health and Wellness                         | <a href="https://novascotia.ca/DHW/">https://novascotia.ca/DHW/</a>                                                                                                                                                                                                                                                                 |
| Nunavut                                        | Nunavut Department of Health                                          | <a href="https://www.gov.nu.ca/health">https://www.gov.nu.ca/health</a>                                                                                                                                                                                                                                                             |
| Ontario                                        | Ontario Ministry of Health and Long-Term Care                         | <a href="http://www.health.gov.on.ca/en/">http://www.health.gov.on.ca/en/</a>                                                                                                                                                                                                                                                       |
| Prince Edward Island                           | Health PEI                                                            | <a href="https://www.princeedwardisland.ca/en/topic/health-pe">https://www.princeedwardisland.ca/en/topic/health-pe</a>                                                                                                                                                                                                             |
| Quebec                                         | Quebec Department of Health and Social Services                       | <a href="http://www4.gouv.qc.ca/EN/Portail/Citoyens/ServicesEnLigne/Pages/SanteServicesSociaux.aspx">http://www4.gouv.qc.ca/EN/Portail/Citoyens/ServicesEnLigne/Pages/SanteServicesSociaux.aspx</a>                                                                                                                                 |
| Saskatchewan                                   | Saskatchewan Ministry of Health                                       | <a href="https://www.saskatchewan.ca/government/government-structure/ministries/health">https://www.saskatchewan.ca/government/government-structure/ministries/health</a>                                                                                                                                                           |
| Yukon                                          | Yukon Health and Social Services                                      | <a href="http://www.hss.gov.yk.ca/">http://www.hss.gov.yk.ca/</a>                                                                                                                                                                                                                                                                   |

\*Federal programs that insure specific populations
