# Supplementary material
Source: PubMed Central journal article supplement (PMC6276936)
Supplement: supp_6.4.E551_2018-0058-2-at.pdf [file supp_6.4.E551_2018-0058-2-at.pdf]

**Appendix 2 (as supplied by the authors). Data collection form for all federal, provincial and territorial public plans that cover antiretrovirals for adults and seniors**

| Name of all public drug program available to cover antiretrovirals            | Cost sharing requirements        |                                     |                                     |                                                                       | Any restrictions? |                     | Does the plan cover non-HIV related drugs? |
|-------------------------------------------------------------------------------|----------------------------------|-------------------------------------|-------------------------------------|-----------------------------------------------------------------------|-------------------|---------------------|--------------------------------------------|
|                                                                               | Premium yes/no? amount? maximum? | Deductible yes/no? amount? maximum? | Co-payment yes/no? amount? maximum? | Co-ordination with other payers yes/no? who is 1 <sup>st</sup> payer? | prescriber        | Dispensing pharmacy |                                            |
| Name of jurisdiction:                                                         |                                  |                                     |                                     |                                                                       |                   |                     |                                            |
| What is the plan name and eligibility criteria for:<br>a. general population? |                                  |                                     |                                     |                                                                       |                   |                     |                                            |
| b. social assistance?                                                         |                                  |                                     |                                     |                                                                       |                   |                     |                                            |
| c. seniors (over age 65)                                                      |                                  |                                     |                                     |                                                                       |                   |                     |                                            |

<sup>1</sup>Premium: the amount an individual must pay to be enrolled in the program

<sup>2</sup>Deductible: the amount that must be paid by the individual before the program pays for any part of the drug costs.

<sup>3</sup>Co-payment: the amount or portion an individual pays with each prescription filled.
