# Supplementary material
Source: PubMed Central journal article supplement (PMC6276936)
Supplement: supp_6.4.E551_2018-0058-3-at.pdf [file supp_6.4.E551_2018-0058-3-at.pdf]

**Appendix 3 (as supplied by the authors).** Calculation of annual out-of-pocket expenses for ARV regimen<sup>1</sup>, December 2017

| Jurisdiction                                                                                                                                                                        | Clinical scenario 1:<br>Single man earning after tax income of \$39,000/year purchasing regimen that costs \$15,552 annually (\$1296/month) |                                   |                                                                                     |                                                                                                               | Clinical scenario 2:<br>Married female with 2 children earning after tax household income of \$80,000 purchasing a regimen that costs \$15552 annually (\$1296/month) |                                   |                                                                                     |                                                                                                               |
|-------------------------------------------------------------------------------------------------------------------------------------------------------------------------------------|---------------------------------------------------------------------------------------------------------------------------------------------|-----------------------------------|-------------------------------------------------------------------------------------|---------------------------------------------------------------------------------------------------------------|-----------------------------------------------------------------------------------------------------------------------------------------------------------------------|-----------------------------------|-------------------------------------------------------------------------------------|---------------------------------------------------------------------------------------------------------------|
|                                                                                                                                                                                     | Premium                                                                                                                                     | Deductible                        | Co-payment                                                                          | Total costs (premium + deductible + co-payment), \$                                                           | Premium                                                                                                                                                               | Deductible                        | Co-payment                                                                          | Total costs, (premium + deductible + co-payment), \$                                                          |
| Alberta                                                                                                                                                                             | 0                                                                                                                                           | 0                                 | 0                                                                                   | 0                                                                                                             | 0                                                                                                                                                                     | 0                                 | 0                                                                                   | 0                                                                                                             |
| British Columbia                                                                                                                                                                    | 0                                                                                                                                           | 0                                 | 0                                                                                   | 0                                                                                                             |                                                                                                                                                                       |                                   |                                                                                     |                                                                                                               |
| Manitoba                                                                                                                                                                            | 0                                                                                                                                           | 39,000x4.79% = 1868               | 0                                                                                   | 1868 <sup>2</sup>                                                                                             | 0                                                                                                                                                                     | (80,000-6000) x 5.5% = 4070       | 0                                                                                   | 4070 <sup>2</sup>                                                                                             |
| New Brunswick                                                                                                                                                                       | 0                                                                                                                                           | 0                                 | 0                                                                                   | 0                                                                                                             | 0                                                                                                                                                                     | 0                                 | 0                                                                                   | 0                                                                                                             |
| Newfoundland and Labrador                                                                                                                                                           | 0                                                                                                                                           | 0                                 | Co-payment rate = 39,000 x 5% ÷ 15,552 = 12.5%<br>Co-payment = 12.5% x 15552 = 1944 | 1944                                                                                                          | 0                                                                                                                                                                     | 0                                 | Co-payment rate = 80,000 x 10% ÷ 15,552 = 51.4%<br>Copayment = 51.4% x 15552 = 7993 | 7993                                                                                                          |
| Northwest Territories                                                                                                                                                               | 0                                                                                                                                           | 0                                 | 0                                                                                   | 0                                                                                                             | 0                                                                                                                                                                     | 0                                 | 0                                                                                   | 0                                                                                                             |
| Nova Scotia                                                                                                                                                                         | 0                                                                                                                                           | 0                                 | 4x11.25 = 45                                                                        | 45                                                                                                            | 0                                                                                                                                                                     | 0                                 | 4x11.25 = 45                                                                        | 45                                                                                                            |
| Nunavut                                                                                                                                                                             | 0                                                                                                                                           | 0                                 | 0                                                                                   | 0                                                                                                             | 0                                                                                                                                                                     | 0                                 | 0                                                                                   | 0                                                                                                             |
| Ontario                                                                                                                                                                             | 0                                                                                                                                           | 39,000x3.446% = 1344 <sup>3</sup> | 4x2=8                                                                               | 1352                                                                                                          | 0                                                                                                                                                                     | 80,000x3.736% = 2989 <sup>3</sup> | 4x2=8                                                                               | 2997                                                                                                          |
| Prince Edward Island                                                                                                                                                                | 0                                                                                                                                           | 0                                 | 0                                                                                   | 0                                                                                                             | 0                                                                                                                                                                     | 0                                 | 0                                                                                   | 0                                                                                                             |
| Quebec                                                                                                                                                                              | 0-677                                                                                                                                       | \$19.45                           | (1296 – 19.45) x 34.8% = 463.69                                                     | 1066 + premium<br><br>Yearly maximum of \$1066 used as monthly value exceeds monthly maximum of \$88.83/month | 0-677                                                                                                                                                                 | \$19.45                           | (1296 – 19.45) x 34.8% = 463.69                                                     | 1066 + premium<br><br>Yearly maximum of \$1066 used as monthly value exceeds monthly maximum of \$88.83/month |
| Saskatchewan <sup>4</sup>                                                                                                                                                           | 0                                                                                                                                           | 39,000x3.4% = 1326                | 0                                                                                   | 1326 <sup>2</sup>                                                                                             | 0                                                                                                                                                                     | 80,000x3.4% = 2720                | 0                                                                                   | 2720 <sup>2</sup>                                                                                             |
| Yukon                                                                                                                                                                               | 0                                                                                                                                           | 250                               | 0                                                                                   | 250                                                                                                           | 0                                                                                                                                                                     | 250                               | 0                                                                                   | 250                                                                                                           |
| Federal Programs<br><br>(Non-insured health Benefit program, Interim Federal health program, Verteran Affairs Canada, Correctional Service Canada, Canadian Forces Health Services) | 0                                                                                                                                           | 0                                 | 0                                                                                   | 0                                                                                                             | 0                                                                                                                                                                     | 0                                 | 0                                                                                   | 0                                                                                                             |

<sup>1</sup>ARV regimen = antiretroviral regimen consisting of the single co-formulated tablet abacavir/lamivudine/dolutegravir

<sup>2</sup>Total cost is underestimated as deductible was calculated with after tax income rather than using taxable income as required by provincial program

<sup>3</sup>Deductible determined from grid in "A Guide to Understanding the Trillium Drug Program", Queen's Printer for Ontario, 2013.

<sup>4</sup>On April 10, 2018, the government of Saskatchewan announced a change in their reimbursement policy to provide universal coverage for HIV medications to all registered residents. Data presented are those extracted in December 2017
