# Supplementary material
Source: PubMed Central journal article supplement (PMC6276936)
Supplement: supp_6.4.E551_2018-0058-original-submission.pdf [file supp_6.4.E551_2018-0058-original-submission.pdf]

**Public prescription drug plan coverage for antiretrovirals and the potential cost to persons living with HIV in**

**Canada:**

**a descriptive study**

Deborah Yoong, BScPhm, PharmD

Department of Pharmacy, St. Michael's Hospital, Toronto, ON

Ahmed M. Bayoumi, MD, MSc, FRCPC

Centre for Urban Health Solutions, Li Ka Shing Knowledge Institute, St. Michael's Hospital, Toronto, ON

Department of Medicine, University of Toronto, Toronto, ON

Linda Robinson, BScPhm

Department of Pharmacy, Windsor Regional Hospital, Windsor, ON

Beth Rachlis, PhD

Ontario HIV Treatment Network, Toronto ON

Tony Antoniou, PharmD, PhD

Department of Family and Community Medicine, St. Michael's Hospital, Toronto ON

Corresponding author:

Deborah Yoong

[yoongd@smh.ca](mailto:yoongd@smh.ca)

current word count: 2475

## Introduction

International guidelines recommend that combination antiretroviral therapy for people living with human immunodeficiency virus (HIV) infection be initiated promptly after diagnosis and continued for life to decrease morbidity, mortality, and the risk of transmission to uninfected individuals<sup>1-5</sup>. However, in Canada, the list price for first-line single tablet regimens is approximately \$15,000 per year<sup>6</sup> and none of Canada's publicly funded drug plans provide universal coverage of all prescription drugs. Instead of a single national plan, each of Canada's 10 provinces and 3 territorial governments of Canada manage and deliver health care services for their residents, including medication coverage (several federal plans insure specific populations). Each plan decides on eligibility criteria for public drug insurance, level of subsidy, and products listed on the drug formulary. Consequently, Canadians with identical prescriptions may pay substantially different amounts and may rely on private insurance, public funders, out-of-pocket payments, or a combination of these to pay for their medication<sup>7-9</sup>.

Financial burdens are associated with medication non-adherence<sup>10</sup>. Research indicates that medicine costs sometimes compete with other demands, leading to cost-related non-adherence, which may manifest as foregoing prescribed medications in favour of spending on other priorities or altering a medication's dosing to make a prescription last longer<sup>10,11</sup>. Accordingly, cost-sharing mechanisms that require large out-of-pocket payments for antiretrovirals may be important to address, particularly for people without drug insurance and those with more limited income<sup>12,13</sup>. Non-adherence to antiretrovirals can lead to uncontrolled HIV replication and subsequently, to increased risks of disease progression<sup>14</sup>, drug resistance<sup>15</sup>, and HIV transmission<sup>16,17</sup>. Because viral suppression prevents infection at the individual level<sup>5,16-18</sup> and may be effective in reducing transmission at the population level<sup>19-21</sup>, affordable and accessible antiretroviral therapy for all should be considered and has been highlighted as a fundamental component of a public response to the HIV epidemic<sup>2</sup>. Our primary objective was to describe and compare the reimbursement policy of all Canadian public drug insurance programs for antiretroviral drugs. To illustrate the financial burden that people living with HIV in Canada encounter in trying to obtain their HIV medication, we used two clinical scenarios to estimate the potential annual out-of-pocket expenditures when patients are prescribed HIV medication in each jurisdiction.

## Methods

### Sources of data

We searched the government websites of all jurisdictions in Canada that offered coverage for antiretroviral drugs in December 2017 (Appendix 1). We extracted data including eligibility criteria, cost-sharing rules, permission to coordinate with private payers, and whether there were restrictions pertaining to the prescriber or the dispensing pharmacy (Appendix 2). To validate the data, we asked a pharmacist in each jurisdiction with expertise in providing HIV care or familiarity with the respective antiretroviral reimbursement plans and systems required to secure drug coverage for individual patients to review the information for accuracy (with the exception of the federal programs and Nunavut where we did not have an email address of a representative pharmacist). If there were incorrect data, the pharmacist consulted another local representative and a consensus was reached. We focused exclusively on HIV treatment and not coverage of antiretrovirals for HIV prevention.

### Patient Scenarios

To illustrate and compare the annual out-of-pocket expenditures for antiretrovirals in working individuals, we created two clinical scenarios that reflected typical patients seen in clinical practice who did not have any work-place or private drug insurance and did not belong to groups typically eligible for publicly funded drug coverage, such as seniors (age  $\geq 65$  years), children, and social assistance recipients. The first case was a single man, age 30, with no dependents and a net annual household income of \$39,000. The second case was a married woman, age 48, with two children and a net annual household income of \$80,000. In each case, the individual was prescribed abacavir/lamivudine/dolutegravir, a commonly prescribed first-line single tablet antiretroviral regimen listed in all public drug formularies.

### Calculation of costs

For each jurisdiction, we calculated each person's expected annual expenditure for the antiretroviral regimen according to the applicable plan and the cost-sharing rules (Table 1, Appendix 3). For example, in Nova Scotia, for both case scenarios, there is no premium, no deductible, but four co-payments of \$11.25 for each 90-day prescription totaling \$45 annually. While there is also no premium in Ontario, the man with an income of \$39,000 would be required to pay an annual deductible of \$1344 (3.446% of \$39,000) plus four co-payments of \$2 for each of his

1 prescriptions, resulting in \$1352 paid out-of-pocket. Each calculation was verified by the same pharmacist who  
2 confirmed coverage details and any discrepancies were resolved by consensus with a second local representative. We  
3 assumed a 90-day supply was obtained 4 times a year and, to simplify comparisons, used the same income in each  
4 region although programs use different income values used for calculating benefits. For example, deductibles in  
5 Ontario are calculated using *net* household income, while Manitoba calculates a “total adjusted family income” as the  
6 *total taxable* income minus \$3,000 for each dependent under the age of 18. We calculated prescription costs using  
7 the amount reimbursed by Ontario’s Ministry of Health and Long-Term Care to pharmacies, as listed on the Ontario  
8 Drug Benefit formulary in December 2017<sup>6</sup>. We therefore assumed that prices were similar across jurisdictions and  
9 that any effect of negotiated prices discounts were minimal and excluded mark-ups and professional’ fees. This was a  
10 descriptive, non-qualitative analysis without pre-determined hypotheses; thus, no statistical analyses were conducted.  
11  
12  
13  
14  
15  
16  
17  
18  
19  
20  
21  
22  
23

## 24 **Results:**

### 25 **Public prescription plans**

26 We found inter- and intra-jurisdictional variability in cost-sharing rules for antiretrovirals across public drug programs  
27 (Table 1 and 2). Five federal drug insurance programs and at least one program in each province or territory provided  
28 some form of financial assistance for registered residents of Canada requiring HIV treatment. All five federal  
29 programs, which are portable across the country, fully subsidized the cost of antiretrovirals for eligible patients  
30 regardless of their age or income. Beyond these programs, the governments of British Columbia, Alberta, the  
31 Northwest Territories, Nunavut, and Prince Edward Island also offered universal coverage of antiretrovirals for all of  
32 their residents living with HIV. In New Brunswick, because premiums and co-payments were waived and not collected,  
33 the plan functioned as a universal one.  
34  
35  
36  
37  
38  
39  
40  
41  
42  
43  
44  
45  
46  
47  
48

49 All other jurisdictions had either a co-payment, a deductible, or both for antiretrovirals. Quebec also collected a yearly  
50 income-based premium of \$0 to \$667 from non-insured individuals whether they purchased drugs or not. There was  
51 no limit to the annual income-based deductible collected in Manitoba, Newfoundland and Labrador, Ontario, and  
52 Saskatchewan, and high incomes did not disqualify an individual from receiving government assistance in any  
53  
54  
55  
56  
57  
58  
59  
60

1 jurisdiction except in Newfoundland and Labrador where there was no assistance available for a resident with a net  
2 household income of greater than \$150,000 annually.  
3  
4  
5

6 In almost all regions where antiretroviral expenses were shared, fees were reduced or waived for individuals with very  
7 low incomes. Seniors, in contrast, incurred the same out-of-pocket expenses as their non-senior counterparts with  
8 the same income in Manitoba and Nova Scotia. Ontario, Quebec, Saskatchewan, and Newfoundland and Labrador,  
9 had multiple programs with eligibility criteria varying according to age, income, or drug costs.  
10  
11  
12  
13  
14  
15

16 The programs also differed in other ways. First, although British Columbia, Alberta, New Brunswick, and Prince Edward  
17 Island provide antiretrovirals at no cost to their residents, these provinces did not provide universal coverage of non-  
18 HIV related prescriptions. Second, coordination of benefits with private insurers was allowed in all programs sharing  
19 antiretroviral costs except Quebec. Similarly, a patient living in New Brunswick was not eligible for free antiretrovirals  
20 from the government if she received any benefits from a private plan, whether the plan was full or partial. Third,  
21 there were interprovincial differences in antiretroviral prescribing and dispensing, with seven jurisdictions (Alberta,  
22 British Columbia, New Brunswick, Nova Scotia, Ontario, Saskatchewan, and the Yukon) and Correctional Service  
23 Canada placing restrictions on the prescriber authorizing the regimen, and five provinces (Alberta, British Columbia,  
24 New Brunswick, Nova Scotia, Prince Edward Island) and Correctional Service Canada assigning designated pharmacies  
25 to dispense these therapies.  
26  
27  
28  
29  
30  
31  
32  
33  
34  
35  
36  
37  
38  
39  
40  
41

#### 42 **Patient scenarios and calculated costs**

43 The annual cost of single-tablet abacavir/lamivudine/dolutegravir in the Ontario Drug Benefit formulary was  
44 \$15,552.<sup>6</sup> Our first hypothetical case of a single man with an annual income of \$39,000 had no out-of-pocket expenses  
45 if he lived in Alberta, British Columbia, Northwest Territories, Nunavut, New Brunswick, or Prince Edward Island, but  
46 had an annual prescription cost that varied from \$45 to \$1944 if he resided elsewhere (Figure 1, Appendix 3). Our  
47 second hypothetical case, a married woman with about twice the annual household income of the first case, received  
48 her medications at no cost in the same six regions, incurred the same expense if she lived in Nova Scotia, the Yukon,  
49 and Quebec (although would have had to pay a greater premium when she filed her higher household tax return) and  
50  
51  
52  
53  
54  
55  
56  
57  
58  
59  
60

1 paid \$2720 to \$7993 (17% to over 50% of the antiretroviral cost) if she lived in one of the remaining regions (Figure 1  
2 and 2, appendix 3).  
3  
4  
5

## 6 **Interpretation**

8 We studied antiretroviral reimbursement policies across public drug plans in Canada. Our main finding was that there  
9 is considerable variability across public drug insurance programs for these high-cost drugs, such that an individual may  
10 incur hundreds or thousands of dollars of additional costs based solely on location. Our descriptive review identified  
11 this disparity was most striking for high income earners without private drug insurance. For these individuals, out-of-  
12 pocket expenses would be zero in six regions and could be up to 100% of the antiretroviral cost in jurisdictions with no  
13 maximum annual contribution, namely Saskatchewan, Manitoba, Ontario, and Newfoundland and Labrador. While  
14 the principle of progressivity - that high income earners should contribute a greater proportion of their income to  
15 shared expenditures - is often cited as a criterion for fairness, our cases illustrated that this philosophy is not  
16 universally adopted across the country. Our case of the lower income male paid a greater proportion of his income for  
17 antiretrovirals than our woman with a higher income in Nova Scotia, Quebec and the Yukon (Figure 3). However, even  
18 among high income earners enrolled in cost sharing plans, our review revealed there was disparity in the proportion of  
19 income used to calculate medication costs and varied according to where they lived. In Manitoba, an individual  
20 earning greater than \$75,000 would have a deductible of 6.9% of the family income compared to 4% in Ontario (Table  
21 2). In addition to variability in government subsidies, our review also found a considerable range of program  
22 complexity in terms of eligibility, administration, and restrictions placed on providers or dispensing pharmacies.  
23 Although we did not evaluate the administrative overhead costs associated with these complexities, others have  
24 indicated that considerable cost savings are possible when drug insurance programs are simplified and streamlined.<sup>22</sup>  
25 The complexity of navigating several programs with differing eligibility criteria and application process may also prove  
26 challenging, especially in specific-subgroups of people with HIV, such as individuals with co-existing cognitive disability  
27 or recent immigrants to Canada.  
28  
29  
30  
31  
32  
33  
34  
35  
36  
37  
38  
39  
40  
41  
42  
43  
44  
45  
46  
47  
48  
49  
50  
51  
52  
53  
54  
55

56 Our finding of heterogeneity with Canada's public drug programs is consistent with prior work; however, the  
57 differences across jurisdictions found in other reviews were attributed to the lack of programs for certain sub-  
58  
59  
60

1 populations,<sup>8</sup> drug costs not exceeding the required premiums or deductibles to receive assistance,<sup>7</sup> or difference in  
2 formulary listing<sup>9</sup>. In contrast, while we found that all jurisdictions listed most antiretrovirals and, with the exception  
3 of Newfoundland and Labrador, each had a program to provide coverage for all sub-populations, the main differences  
4 in coverage were due to variations in the amount of individual subsidies based on criteria. In six jurisdictions,  
5 antiretrovirals were fully covered with an HIV diagnosis being the only requirement for eligibility aside from having  
6 provincial/territorial health coverage; in the remaining regions, income and age primarily determined the subsidy  
7 received. Our results suggest that while establishing antiretroviral prescribing programs and formulary listings are  
8 necessary conditions for access to coverage, they are insufficient to ensure universal equitable access to  
9 antiretrovirals.

10  
11  
12  
13  
14  
15  
16  
17  
18  
19  
20  
21  
22 Examples of policy options that could address these inequities across the country in eligibility criteria and value of  
23 subsidies include a comprehensive pharmacare program<sup>22</sup> or explicit national standards for listing and reimbursing  
24 drugs for all age and income groups, perhaps with particular attention to drugs that have implications for public  
25 health<sup>23</sup>. For example, medications for tuberculosis and many sexually transmitted infections are universally covered  
26 in all or almost all jurisdictions, respectively. On April 10, 2018, the government of Saskatchewan joined eleven  
27 jurisdictions and announced they also would provide universal HIV drug coverage to their residents<sup>24</sup>. In recent years,  
28 Canadian jurisdictions (with the exception of Quebec) have established common mechanisms to make listing  
29 recommendations through the Common Drug Review and to conduct price negotiations through the pan-Canadian  
30 Pharmaceutical Alliance<sup>25</sup>. We believe it is also necessary to have national standards and processes to ensure fair and  
31 equal cost-sharing mechanisms across the country.

32  
33  
34  
35  
36  
37  
38  
39  
40  
41  
42  
43  
44  
45  
46  
47 Our study has several limitations. First, we evaluated general reimbursement rules but did not address variations in  
48 restrictions for specific antiretrovirals. Second, while we gathered data from government websites that inform the  
49 public of all available programs, some information may have been missed as details may have only been available in  
50 full policy documents. As we only chose two illustrative scenarios, our findings should not be interpreted as being  
51 comprehensive (representing all scenarios) or representative (representing the most common scenarios), although we  
52 believe they will be relevant for many patients. We did not conduct analyses to determine which reimbursement  
53  
54  
55  
56  
57  
58  
59  
60

1 policies were most prohibitive; this was beyond the scope of our research. Although we solely used the listed drug  
2 price from the Ontario drug benefit formulary for our out-of-pocket expenditure comparison and other jurisdictions  
3  
4 may have negotiated higher or lower medication prices resulting in different out-of-pocket costs, the actual price  
5  
6 would have no implication for patients in jurisdictions which only used income-based deductibles (e.g. Manitoba,  
7  
8 Ontario, and Saskatchewan) or capped out-of-pocket payments (e.g. Quebec, Yukon). Our study was also restricted to  
9  
10 public antiretroviral coverage for adults; we did not examine reimbursement policies for children and youth. Finally,  
11  
12 while we documented inequities in cost-sharing, we did not examine whether these inequities result in financial  
13  
14 hardship or negative health outcomes. Exploratory research has suggested antiretroviral-associated costs compete  
15  
16 with other essential needs<sup>26</sup>. Our group and others have shown that cost-sharing arrangements for antiretrovirals  
17  
18 result in significant numbers of patients who are unable to afford their medications<sup>27,28</sup> and consequently, non-  
19  
20 adherence<sup>12,13</sup>.  
21  
22  
23  
24  
25

26  
27 Our study revealed stark inter- and intra-jurisdiction differences for antiretroviral coverage, despite the existence of a  
28  
29 public drug plan in each jurisdiction. These disparities result in unequal costs for individuals living in Canada with  
30  
31 identical prescriptions, hindering health equalities across the nation. Addressing cost sharing inequities may be an  
32  
33 important strategy for policy makers to consider to achieve Canada's commitment to the final two goals of the  
34  
35 UNAIDS strategy, in which 90% of all people living with HIV know their HIV status, 90% of all people diagnosed with  
36  
37 HIV receive antiretroviral therapy, and 90% of all people receiving HIV treatment are virally suppressed by 2020<sup>29</sup>.  
38  
39  
40  
41  
42  
43  
44  
45  
46  
47  
48  
49  
50  
51  
52  
53  
54  
55  
56  
57  
58  
59  
60



## References

1. Panel on Antiretroviral Guidelines for Adults and Adolescents. Guidelines for the use of antiretroviral agents in adults and adolescents living with HIV. Department of Health and Human Services. Available at <http://aidsinfo.nih.gov/contentfiles/lvguidelines/AdultandAdolescentGL.pdf>.
2. Consolidated guidelines on the use of antiretroviral drugs for treating and preventing HIV infections: recommendations for a public health approach, second edition. World Health Organization, 2016
3. BHIVA guidelines for the treatment of HIV-1-positive adults with antiretroviral therapy 2015 (2016 interim update). Available at: [www.bhiva.org/HIV-1-treatment-guideline.aspx](http://www.bhiva.org/HIV-1-treatment-guideline.aspx)
4. INSIGHT START Study Group, Lundgren JD, Babiker AG, et al. Initiation of antiretroviral therapy in early asymptomatic HIV infection. *N Engl J Med*. 2015;373(9):795-807.
5. Cohen MS, Chen YQ, McCauley M, et al. Antiretroviral therapy for the prevention of HIV-1 transmission. *N Engl J Med*. 2016;375(9):830-839
6. Ontario Ministry of Health and Long Term Care (MOHLTC) Ontario Drug Benefit Formulary, Edition 42. Retrieved December 2017. <https://www.formulary.health.gov.on.ca/formulary/>
7. Campbell DJT, Manns BJ, Soril LJJ, Clement F. Comparison of Canadian public medication insurance plans and the impact on out-of-pocket costs. *CMAJ Open* 2017; 5(4) E808-E813.
8. Demers V, Melo M, Jackevicius C, Cox J, Kalavrouziotis D, Rinfret S, et al. Comparisons of provincial prescription drug plans and the impact on patients' annual drug expenditures. *CMAJ* 2008; 178(4):405-09.
9. Hasan H, Howard F, Morgan S, Metzger DL, Lo A, Goddard K. Provincial disparities of growth hormone coverage for young adult survivors of paediatric brain tumors across Canada. *Healthc Policy* 2014; 9(3): 80-96.
10. Law MR, Cheng L, Dhalla IA, Heard D, Morgan SC. The effect of cost on adherence to prescription medications in Canada. *Canadian Medical Association Journal* 2012; 184(3):297-302.
11. Law MR, Cheng L, Kolhatkar A, et al. The consequences of patient charges for prescriptions drugs in Canada: a cross-sectional survey. *CMAJ Open* 2018; 6(1) E63-E70.
12. Johnston SS, Juday T, Seekins D, Espindle D, Chu BC. Association between prescription cost sharing and adherence to initial combination antiretroviral therapy in commercially insured antiretroviral-naive patients with HIV. *Journal of Managed Care Pharmacy* 2012; 18(2):129-45.
13. McAllister J, Beardsworth G, Lavie E, MacRae K, Carr A. Financial stress is associated with reduced treatment adherence in HIV-infected adults in a resource-rich setting. *HIV Medicine* 2013; 14:120-24.
14. Bangsberg DR, Perry S, Charlebois ED, et al. Non-adherence to highly active antiretroviral therapy predicts progression to AIDS. *AIDS* 2001; 15(9):1181-83.

15. Bangsberg DR, Kroetz DL, Deeks SG. Adherence-resistance relationships to combination HIV antiretroviral therapy; *Current HIV/AIDS Report* 2007; 4(2):65-72.
16. Garcia, PM, Kalish LA, Pitt J, et al. Maternal levels of plasma human immunodeficiency virus type 1 RNA and the risk of perinatal transmission. *N Engl J Med* 1999; 341(6):394-402.
17. Quinn, TC, Wawer MJ, Sewankambo N, et al. Viral load and heterosexual transmission of human immunodeficiency virus type 1. *N Engl J Med* 2000; 342(13):921-29.
18. Rodger AJ, Cambiano V, Bruun T, et al. Sexual activity without condoms and risk of HIV transmission in serodifferent couples when the HIV-positive partner is using suppressive antiretroviral therapy. *JAMA* 2016; 316(2):171-181.
19. Fang, CT, Hsu HM, Twu SJ, et al. Decreased HIV Transmission after a Policy of Providing Free Access to Highly Active Antiretroviral Therapy in Taiwan. *J Infect Dis* 2004; 190:879-85.
20. Granich RM, Gilks CF, Dye C, De Cock KM, Williams BG. Universal voluntary HIV testing with immediate antiretroviral therapy as a strategy for elimination of HIV transmission: a mathematical model. *Lancet*. 2009;373(9657):48-57
21. Montaner JS, Lima VD, Harrigan PR, et al. Expansion of HAART coverage is associated with sustained decreases in HIV/AIDS morbidity, mortality and HIV transmission: The HIV treatment as prevention experience in a Canadian setting. *PLoS One* 2014; 9(2):e87872
22. Morgan SG, Martin D, Gagnon MA, Mintzes B, Daw JR, Lexchin J. (2015) *Pharmacare 2020: The future of drug coverage in Canada*. Vancouver, Pharmaceutical Policy Research Collaboration, University of British Columbia. Available at [www.pharmacare2020.ca](http://www.pharmacare2020.ca)
23. Morgan et al. Estimated effects of adding universal public coverage of an essential medicine list to existing public drug plans in Canada; *CMAJ* 2017;189:E295-302.
24. Government of Saskatchewan. Record \$5.36 billion invested in improving health care. (Available at <http://www.saskatchewan.ca/government/news-and-media/2018/april/10/budget-health>)
25. Allen N, Walker SR, Liberti L, et al. Evaluating alignment between Canadian Common Drug Dreview reimbursement recommendations and provincial drug plan listing decisions: an exploratory study. *CMAJ Open* 2016; 4(4): E674-E678.
26. Rachlis B, Light L, Kopansky-Giles, et al. Challenges with affording HIV medications among participants in the Ontario HIV Treatment Network Cohort Study [abstract EPHP12.08]. Presented at: The 27<sup>th</sup> Annual Conference on HIV/AIDS Research (CAHR), Vancouver, BC, April 26-29, 2018. (poster)
27. Yoong D, Naccarato M, Gough K, Lewis J, Bayoumi A. Use of compassionate supply of antiretroviral drugs to avoid treatment interruptions of delayed treatment initiation among HIV-positive patients living in Ontario: a retrospective review. *Healthc Policy* 2015; 10(3) 64-77.

- 1  
2  
3  
4  
5  
6  
7  
8  
9  
10  
11  
12  
13  
14  
15  
16  
17  
18  
19  
20  
21  
22  
23  
24  
25  
26  
27  
28  
29  
30  
31  
32  
33  
34  
35  
36  
37  
38  
39  
40  
41  
42  
43  
44  
45  
46  
47  
48  
49  
50  
51  
52  
53  
54  
55  
56  
57  
58  
59  
60
28. Chan S, Ireland L, Becker M, et al. The need for compassionate supply of antiretroviral medications provided by the Manitoba HIV Program: A retrospective review. Presented at: The 25<sup>th</sup> Annual Conference on HIV/AIDS Research (CAHR), Winnipeg, Manitoba; May 12-15, 2016. (poster).
29. UNAIDS. 90-90-90 An ambitious treatment target to help end the AIDS epidemic, 2014 (Available at [www.unaids.org/en/resources/documents/2017/90-90-90](http://www.unaids.org/en/resources/documents/2017/90-90-90))

Confidential

**Table 1. Characteristics of all Canadian publicly funded federal drug plans that cover antiretrovirals for adults and seniors, December 2017**

| Public drug program eligibility                                                                                                                                                               | Cost sharing requirements |                         |                         |                                | Restrictions              |                                                          | plan covers non-HIV related drugs |
|-----------------------------------------------------------------------------------------------------------------------------------------------------------------------------------------------|---------------------------|-------------------------|-------------------------|--------------------------------|---------------------------|----------------------------------------------------------|-----------------------------------|
|                                                                                                                                                                                               | Premium <sup>1</sup>      | Deductible <sup>2</sup> | co-payment <sup>3</sup> | co-ordinates with other payers | prescriber                | pharmacy                                                 |                                   |
| <b>Non-insured Health Benefit (NIHB) program</b><br>A registered First Nation person, an Inuk recognized by an Inuit land claim organization                                                  | \$0                       | \$0                     | \$0                     | private first                  | none                      | none                                                     | yes                               |
| <b>Interim Federal Health program (IFHP)</b><br>Resettled refugees, protected persons, refugee claimants, victims of human trafficking, detainees                                             | \$0                       | \$0                     | \$0                     | N/A                            | follows provincial policy | follows provincial policy                                | follows provincial formulary      |
| <b>Veteran Affairs Canada prescription drug program</b><br>Royal Canadian Mounted Police members, Canadian war veterans, eligible Canadian Armed Forces members and certain wartime civilians | \$0                       | \$0                     | \$0                     | private first                  | none                      | none                                                     | benefits related to plan          |
| <b>Correctional Service Canada (CSC)</b><br>Federal inmates                                                                                                                                   | \$0                       | \$0                     | \$0                     | N/A                            | CSC institution physician | CSC institution                                          | yes                               |
| <b>Canadian Forces Health Services (CFHS)</b><br>Canadian Armed Forces Personnel and authorized visiting military forces, foreign military exchange personnel and their dependents            | \$0                       | \$0                     | \$0                     | N/A                            | none                      | local base pharmacy or community pharmacy if after hours | yes                               |

<sup>1</sup>Premium: the amount an individual must pay to be enrolled in the program

<sup>2</sup>Deductible: the amount that must be paid by the individual before the program pays for any part of the drug costs.

<sup>3</sup>Co-payment: the amount or portion an individual pays with each prescription filled.

**Table 2. Characteristics of all Canadian publicly funded Provincial/Territorial drug plans that cover antiretrovirals for adults and seniors, December 2017**

| Public drug program eligibility                                                                                                                                                                         | Cost sharing plan    |                                                                                             |                         |                                | Restrictions     |          | plan covers non-HIV related drugs |
|---------------------------------------------------------------------------------------------------------------------------------------------------------------------------------------------------------|----------------------|---------------------------------------------------------------------------------------------|-------------------------|--------------------------------|------------------|----------|-----------------------------------|
|                                                                                                                                                                                                         | Premium <sup>1</sup> | Deductible <sup>2</sup>                                                                     | co-payment <sup>3</sup> | co-ordinates with other payers | prescriber       | pharmacy |                                   |
| <b>Alberta</b>                                                                                                                                                                                          |                      |                                                                                             |                         |                                |                  |          |                                   |
| <b>Alberta Health Care Insurance Plan, Specialized High Cost Drug Program</b><br>• Registered <sup>4</sup> Alberta resident                                                                             | \$0                  | \$0                                                                                         | \$0                     | no                             | yes              | yes      | no                                |
| <b>British Columbia</b>                                                                                                                                                                                 |                      |                                                                                             |                         |                                |                  |          |                                   |
| <b>British Columbia Centre for Excellence HIV Drug Treatment Program</b><br>• HIV-positive British Columbia resident<br>• Resident with coverage from another jurisdiction awaiting BC medical coverage | \$0                  | \$0                                                                                         | \$0                     | no                             | yes <sup>5</sup> | yes      | no                                |
| <b>Manitoba</b>                                                                                                                                                                                         |                      |                                                                                             |                         |                                |                  |          |                                   |
| <b>Pharmacare Program</b><br>• Registered Manitoba resident                                                                                                                                             | \$0                  | 3.05 to 6.9% of adjusted family income <sup>6</sup><br><br>Not prorated; minimum \$100/year | \$0                     | province first                 | no               | no       | yes                               |
| <b>Employment and Income Assistance – Prescription drugs</b>                                                                                                                                            | \$0                  | \$0                                                                                         | \$0                     | province first                 | no               | no       | yes                               |
| <b>New Brunswick</b>                                                                                                                                                                                    |                      |                                                                                             |                         |                                |                  |          |                                   |
| <b>Prescription Drug Program, HIV/AIDS</b><br>• Registered New Brunswick resident not receiving private insurance                                                                                       | \$0 <sup>7</sup>     | \$0                                                                                         | \$0 <sup>7</sup>        | no                             | yes              | yes      | no                                |

| Newfoundland and Labrador (NL) |                                                                                                                                                     |     |     |                                                        |               |     |     |     |
|--------------------------------|-----------------------------------------------------------------------------------------------------------------------------------------------------|-----|-----|--------------------------------------------------------|---------------|-----|-----|-----|
| 1                              | <b>NL Prescription Drug Program</b>                                                                                                                 | \$0 | \$0 | \$0                                                    | N/A           | no  | no  | yes |
| 2                              | Registered resident of                                                                                                                              |     |     |                                                        |               |     |     |     |
| 3                              | Newfoundland and Labrador                                                                                                                           |     |     |                                                        |               |     |     |     |
| 4                              | <b>Foundation plan</b>                                                                                                                              |     |     |                                                        |               |     |     |     |
| 5                              | <ul style="list-style-type: none"> <li>residents that qualify for income support benefits</li> </ul>                                                |     |     |                                                        |               |     |     |     |
| 6                              | <b>Access Plan</b>                                                                                                                                  | \$0 | \$0 | 20-70% of total prescription cost (varies with income) | private first | no  | no  | yes |
| 7                              | <ul style="list-style-type: none"> <li>families with children with net income <math>\leq</math> \$42,870</li> </ul>                                 |     |     |                                                        |               |     |     |     |
| 8                              | <ul style="list-style-type: none"> <li>couples without children with net income <math>\leq</math> \$30,009</li> </ul>                               |     |     |                                                        |               |     |     |     |
| 9                              | <ul style="list-style-type: none"> <li>single individuals with net income <math>\leq</math> \$27,151</li> </ul>                                     |     |     |                                                        |               |     |     |     |
| 10                             |                                                                                                                                                     |     |     |                                                        |               |     |     |     |
| 11                             |                                                                                                                                                     |     |     |                                                        |               |     |     |     |
| 12                             |                                                                                                                                                     |     |     |                                                        |               |     |     |     |
| 13                             |                                                                                                                                                     |     |     |                                                        |               |     |     |     |
| 14                             | <b>Assurance Plan</b>                                                                                                                               | \$0 | \$0 | co-payment rate =incomex5%/total drug expenditure      | private first | no  | no  | yes |
| 15                             | <ul style="list-style-type: none"> <li>residents with eligible drug costs that exceed 5% of net income &lt;\$40,000</li> </ul>                      |     |     |                                                        |               |     |     |     |
| 16                             |                                                                                                                                                     |     |     |                                                        |               |     |     |     |
| 17                             |                                                                                                                                                     |     |     |                                                        |               |     |     |     |
| 18                             | <ul style="list-style-type: none"> <li>residents with eligible drug costs that exceed 7.5% of net income between \$40,000-\$74,999</li> </ul>       | \$0 | \$0 | co-payment rate =incomex7.5% / total drug expenditure  | private first | no  | no  | yes |
| 19                             |                                                                                                                                                     |     |     |                                                        |               |     |     |     |
| 20                             |                                                                                                                                                     |     |     |                                                        |               |     |     |     |
| 21                             |                                                                                                                                                     |     |     |                                                        |               |     |     |     |
| 22                             |                                                                                                                                                     |     |     |                                                        |               |     |     |     |
| 23                             | <ul style="list-style-type: none"> <li>residents with eligible drug costs that exceed 10% of net income \$75,000 to &lt;\$149,999</li> </ul>        | \$0 | \$0 | co-payment rate =incomex10% / total drug expenditure   | private first | no  | no  | yes |
| 24                             |                                                                                                                                                     |     |     |                                                        |               |     |     |     |
| 25                             |                                                                                                                                                     |     |     |                                                        |               |     |     |     |
| 26                             |                                                                                                                                                     |     |     |                                                        |               |     |     |     |
| 27                             |                                                                                                                                                     |     |     |                                                        |               |     |     |     |
| 28                             | <b>65Plus Plan</b>                                                                                                                                  | \$0 | \$0 | maximum \$6 dispensing fee                             | private first | no  | no  | yes |
| 29                             | <ul style="list-style-type: none"> <li>residents age 65 or older who receive old age security benefits and guaranteed income supplement</li> </ul>  |     |     |                                                        |               |     |     |     |
| 30                             |                                                                                                                                                     |     |     |                                                        |               |     |     |     |
| 31                             |                                                                                                                                                     |     |     |                                                        |               |     |     |     |
| 32                             |                                                                                                                                                     |     |     |                                                        |               |     |     |     |
| 33                             | <b>Northwest Territories</b>                                                                                                                        |     |     |                                                        |               |     |     |     |
| 34                             | <b>Extended Health Benefits for Specified Disease Conditions</b>                                                                                    | \$0 | \$0 | \$0                                                    | private first | no  | no  | yes |
| 35                             | <ul style="list-style-type: none"> <li>for non-indigenous registered NWT resident</li> </ul>                                                        |     |     |                                                        |               |     |     |     |
| 36                             | <b>Metis Health Benefits program</b>                                                                                                                | \$0 | \$0 | \$0                                                    | private first | no  | no  | yes |
| 37                             | <ul style="list-style-type: none"> <li>for registered indigenous Metis and resident of the NWT</li> </ul>                                           |     |     |                                                        |               |     |     |     |
| 38                             |                                                                                                                                                     |     |     |                                                        |               |     |     |     |
| 39                             |                                                                                                                                                     |     |     |                                                        |               |     |     |     |
| 40                             | <b>Extended Health Benefits for Seniors program</b>                                                                                                 | \$0 | \$0 | \$0                                                    | private first | no  | no  | yes |
| 41                             | <ul style="list-style-type: none"> <li>for non-indigenous and non-Metis registered residents of the NWT who are at least 60 years of age</li> </ul> |     |     |                                                        |               |     |     |     |
| 42                             |                                                                                                                                                     |     |     |                                                        |               |     |     |     |
| 43                             |                                                                                                                                                     |     |     |                                                        |               |     |     |     |
| 44                             |                                                                                                                                                     |     |     |                                                        |               |     |     |     |
| 45                             |                                                                                                                                                     |     |     |                                                        |               |     |     |     |
| 46                             | <b>Nova Scotia (NS)</b>                                                                                                                             |     |     |                                                        |               |     |     |     |
| 47                             | <b>NS Department of Health and Wellness – Provincial high cost drug program</b>                                                                     | \$0 | \$0 | \$11.25 dispensing fee                                 | private first | yes | yes | no  |
| 48                             | <ul style="list-style-type: none"> <li>registered resident of NS</li> </ul>                                                                         |     |     |                                                        |               |     |     |     |
| 49                             |                                                                                                                                                     |     |     |                                                        |               |     |     |     |
| 50                             |                                                                                                                                                     |     |     |                                                        |               |     |     |     |
| 51                             | <b>Nunavut</b>                                                                                                                                      |     |     |                                                        |               |     |     |     |
| 52                             | <b>Extended health benefits program</b>                                                                                                             | \$0 | \$0 | \$0                                                    | private first | no  | no  | yes |
| 53                             | <ul style="list-style-type: none"> <li>non-indigenous registered Nunavut resident with a specified condition</li> </ul>                             |     |     |                                                        |               |     |     |     |
| 54                             | <ul style="list-style-type: none"> <li>non-indigenous resident age 65 or older</li> </ul>                                                           |     |     |                                                        |               |     |     |     |
| 55                             | <ul style="list-style-type: none"> <li>registered resident who is</li> </ul>                                                                        |     |     |                                                        |               |     |     |     |
| 56                             |                                                                                                                                                     |     |     |                                                        |               |     |     |     |
| 57                             |                                                                                                                                                     |     |     |                                                        |               |     |     |     |

|    |                                                                                                                                                                                                                                                                                                                                                      |                                         |                                                                    |                                                                                                  |                |     |     |     |
|----|------------------------------------------------------------------------------------------------------------------------------------------------------------------------------------------------------------------------------------------------------------------------------------------------------------------------------------------------------|-----------------------------------------|--------------------------------------------------------------------|--------------------------------------------------------------------------------------------------|----------------|-----|-----|-----|
| 1  | not fully covered by 3 <sup>rd</sup> party insurance                                                                                                                                                                                                                                                                                                 |                                         |                                                                    |                                                                                                  |                |     |     |     |
| 2  |                                                                                                                                                                                                                                                                                                                                                      |                                         |                                                                    |                                                                                                  |                |     |     |     |
| 3  | <b>Ontario</b>                                                                                                                                                                                                                                                                                                                                       |                                         |                                                                    |                                                                                                  |                |     |     |     |
| 4  | <b>Ontario Drug Benefit</b>                                                                                                                                                                                                                                                                                                                          |                                         |                                                                    |                                                                                                  |                |     |     |     |
| 5  | <ul style="list-style-type: none"> <li>resident of long-term care facility</li> <li>Ontario resident enrolled in the <b>Home Care</b> program</li> <li>Individual enrolled in <b>Ontario Works</b> for income support</li> <li>Individual enrolled in the <b>Ontario Disability Support Program</b> for income support and other services</li> </ul> | \$0                                     | \$0                                                                | \$2 per prescription                                                                             | private first  | yes | no  | yes |
| 6  |                                                                                                                                                                                                                                                                                                                                                      |                                         |                                                                    |                                                                                                  |                |     |     |     |
| 7  |                                                                                                                                                                                                                                                                                                                                                      |                                         |                                                                    |                                                                                                  |                |     |     |     |
| 8  |                                                                                                                                                                                                                                                                                                                                                      |                                         |                                                                    |                                                                                                  |                |     |     |     |
| 9  |                                                                                                                                                                                                                                                                                                                                                      |                                         |                                                                    |                                                                                                  |                |     |     |     |
| 10 |                                                                                                                                                                                                                                                                                                                                                      |                                         |                                                                    |                                                                                                  |                |     |     |     |
| 11 |                                                                                                                                                                                                                                                                                                                                                      |                                         |                                                                    |                                                                                                  |                |     |     |     |
| 12 |                                                                                                                                                                                                                                                                                                                                                      |                                         |                                                                    |                                                                                                  |                |     |     |     |
| 13 | <ul style="list-style-type: none"> <li>Registered resident age 65 or older with net annual income ≤ \$19,300 (single) or net annual income of ≤\$32,300 (with spouse)</li> </ul>                                                                                                                                                                     | \$0                                     | \$0                                                                | \$2 per prescription                                                                             | province first | yes | no  | Yes |
| 14 |                                                                                                                                                                                                                                                                                                                                                      |                                         |                                                                    |                                                                                                  |                |     |     |     |
| 15 |                                                                                                                                                                                                                                                                                                                                                      |                                         |                                                                    |                                                                                                  |                |     |     |     |
| 16 |                                                                                                                                                                                                                                                                                                                                                      |                                         |                                                                    |                                                                                                  |                |     |     |     |
| 17 |                                                                                                                                                                                                                                                                                                                                                      |                                         |                                                                    |                                                                                                  |                |     |     |     |
| 18 | <ul style="list-style-type: none"> <li>Age 65 or older with annual net income &gt;\$19,300 (single) or &gt;\$32,300 (with spouse)</li> </ul>                                                                                                                                                                                                         | \$0                                     | \$100                                                              | \$6.11 per prescription                                                                          | province first | yes | no  | yes |
| 19 |                                                                                                                                                                                                                                                                                                                                                      |                                         |                                                                    |                                                                                                  |                |     |     |     |
| 20 |                                                                                                                                                                                                                                                                                                                                                      |                                         |                                                                    |                                                                                                  |                |     |     |     |
| 21 | <ul style="list-style-type: none"> <li><b>Trillium Drug Program</b></li> <li>Registered Ontario residents with high drug costs</li> </ul>                                                                                                                                                                                                            | \$0                                     | ~4% of net household income<br><br>pro-rated and payable quarterly | \$2 per prescription                                                                             | private first  | yes | no  | yes |
| 22 |                                                                                                                                                                                                                                                                                                                                                      |                                         |                                                                    |                                                                                                  |                |     |     |     |
| 23 |                                                                                                                                                                                                                                                                                                                                                      |                                         |                                                                    |                                                                                                  |                |     |     |     |
| 24 |                                                                                                                                                                                                                                                                                                                                                      |                                         |                                                                    |                                                                                                  |                |     |     |     |
| 25 |                                                                                                                                                                                                                                                                                                                                                      |                                         |                                                                    |                                                                                                  |                |     |     |     |
| 26 |                                                                                                                                                                                                                                                                                                                                                      |                                         |                                                                    |                                                                                                  |                |     |     |     |
| 27 | <b>Prince Edward Island (PEI)</b>                                                                                                                                                                                                                                                                                                                    |                                         |                                                                    |                                                                                                  |                |     |     |     |
| 28 | <b>PEI pharmacare, AIDS/HIV program</b>                                                                                                                                                                                                                                                                                                              | \$0                                     | \$0                                                                | \$0                                                                                              | no             | No  | yes | no  |
| 29 | <ul style="list-style-type: none"> <li>Registered HIV-positive PEI residents</li> </ul>                                                                                                                                                                                                                                                              |                                         |                                                                    |                                                                                                  |                |     |     |     |
| 30 |                                                                                                                                                                                                                                                                                                                                                      |                                         |                                                                    |                                                                                                  |                |     |     |     |
| 31 | <b>Quebec</b>                                                                                                                                                                                                                                                                                                                                        |                                         |                                                                    |                                                                                                  |                |     |     |     |
| 32 | <b>Regie de l'assurance maladie du Quebec</b>                                                                                                                                                                                                                                                                                                        |                                         |                                                                    |                                                                                                  |                |     |     |     |
| 33 | <ul style="list-style-type: none"> <li>Recipient of Social Assistance and Social Solidarity Program</li> <li>a single adult, age 18-25, living with parents and a full-time student in an educational institution at the secondary, college or university level</li> </ul>                                                                           | \$0                                     | \$0                                                                | \$0                                                                                              | no             | no  | no  | yes |
| 34 |                                                                                                                                                                                                                                                                                                                                                      |                                         |                                                                    |                                                                                                  |                |     |     |     |
| 35 |                                                                                                                                                                                                                                                                                                                                                      |                                         |                                                                    |                                                                                                  |                |     |     |     |
| 36 |                                                                                                                                                                                                                                                                                                                                                      |                                         |                                                                    |                                                                                                  |                |     |     |     |
| 37 |                                                                                                                                                                                                                                                                                                                                                      |                                         |                                                                    |                                                                                                  |                |     |     |     |
| 38 |                                                                                                                                                                                                                                                                                                                                                      |                                         |                                                                    |                                                                                                  |                |     |     |     |
| 39 |                                                                                                                                                                                                                                                                                                                                                      |                                         |                                                                    |                                                                                                  |                |     |     |     |
| 40 |                                                                                                                                                                                                                                                                                                                                                      |                                         |                                                                    |                                                                                                  |                |     |     |     |
| 41 | <ul style="list-style-type: none"> <li>Registered Quebec resident age 65 or more receiving 94-100% of the guaranteed income supplement, without private insurance</li> </ul>                                                                                                                                                                         | \$0                                     | \$0                                                                | \$0                                                                                              | no             | no  | no  | yes |
| 42 |                                                                                                                                                                                                                                                                                                                                                      |                                         |                                                                    |                                                                                                  |                |     |     |     |
| 43 |                                                                                                                                                                                                                                                                                                                                                      |                                         |                                                                    |                                                                                                  |                |     |     |     |
| 44 |                                                                                                                                                                                                                                                                                                                                                      |                                         |                                                                    |                                                                                                  |                |     |     |     |
| 45 | <ul style="list-style-type: none"> <li>Registered Quebec resident age 65 or older receiving 1-93% of guaranteed income supplement, without private insurance</li> </ul>                                                                                                                                                                              | 0-\$667 (varies with net family income) | \$19.45 monthly                                                    | After deductible, (total cost of Rx – 19.45) x 34.8% up to maximum of \$52.65/month (\$632/year) | no             | no  | no  | yes |
| 46 |                                                                                                                                                                                                                                                                                                                                                      |                                         |                                                                    |                                                                                                  |                |     |     |     |
| 47 |                                                                                                                                                                                                                                                                                                                                                      |                                         |                                                                    |                                                                                                  |                |     |     |     |
| 48 |                                                                                                                                                                                                                                                                                                                                                      |                                         |                                                                    |                                                                                                  |                |     |     |     |
| 49 |                                                                                                                                                                                                                                                                                                                                                      |                                         |                                                                    |                                                                                                  |                |     |     |     |
| 50 |                                                                                                                                                                                                                                                                                                                                                      |                                         |                                                                    |                                                                                                  |                |     |     |     |
| 51 |                                                                                                                                                                                                                                                                                                                                                      |                                         |                                                                    |                                                                                                  |                |     |     |     |
| 52 | <ul style="list-style-type: none"> <li>Registered Quebec resident age 65 or older not receiving any guaranteed income supplement, without private insurance</li> </ul>                                                                                                                                                                               | 0-\$667 (varies with net family income) | \$19.45 monthly                                                    | After deductible, (total cost of Rx – 19.45) x 34.8% up to maximum of \$88.83/month              | no             | no  | no  | yes |
| 53 |                                                                                                                                                                                                                                                                                                                                                      |                                         |                                                                    |                                                                                                  |                |     |     |     |
| 54 |                                                                                                                                                                                                                                                                                                                                                      |                                         |                                                                    |                                                                                                  |                |     |     |     |
| 55 |                                                                                                                                                                                                                                                                                                                                                      |                                         |                                                                    |                                                                                                  |                |     |     |     |
| 56 |                                                                                                                                                                                                                                                                                                                                                      |                                         |                                                                    |                                                                                                  |                |     |     |     |
| 57 |                                                                                                                                                                                                                                                                                                                                                      |                                         |                                                                    |                                                                                                  |                |     |     |     |

|    |                                                                                                                       |                                         |                                                           |                                                                                                 |                |     |    |     |
|----|-----------------------------------------------------------------------------------------------------------------------|-----------------------------------------|-----------------------------------------------------------|-------------------------------------------------------------------------------------------------|----------------|-----|----|-----|
|    |                                                                                                                       |                                         | (\$1066/yr)                                               |                                                                                                 |                |     |    |     |
| 1  |                                                                                                                       |                                         |                                                           |                                                                                                 |                |     |    |     |
| 2  | • Registered resident of Quebec without private insurance                                                             | 0-\$667 (varies with net family income) | \$19.45 monthly                                           | After deductible, (total cost of Rx – 19.45) x 34.5% up to maximum of \$88.83/month (\$1066/yr) | no             | no  | no | yes |
| 3  |                                                                                                                       |                                         |                                                           |                                                                                                 |                |     |    |     |
| 4  |                                                                                                                       |                                         |                                                           |                                                                                                 |                |     |    |     |
| 5  |                                                                                                                       |                                         |                                                           |                                                                                                 |                |     |    |     |
| 6  |                                                                                                                       |                                         |                                                           |                                                                                                 |                |     |    |     |
| 7  |                                                                                                                       |                                         |                                                           |                                                                                                 |                |     |    |     |
| 8  |                                                                                                                       |                                         |                                                           |                                                                                                 |                |     |    |     |
| 9  | Saskatchewan <sup>8</sup>                                                                                             |                                         |                                                           |                                                                                                 |                |     |    |     |
| 10 | <b>Saskatchewan Drug Plan</b>                                                                                         |                                         |                                                           |                                                                                                 |                |     |    |     |
| 11 |                                                                                                                       |                                         |                                                           |                                                                                                 |                |     |    |     |
| 12 | • <b>Special Support Plan</b>                                                                                         | \$0                                     | 3.4% of taxable income                                    | \$0                                                                                             | province first | yes | no | yes |
| 13 | Registered resident with drug costs greater than 3.4% of taxable income                                               |                                         |                                                           |                                                                                                 |                |     |    |     |
| 14 |                                                                                                                       |                                         |                                                           |                                                                                                 |                |     |    |     |
| 15 | • <b>Seniors Drug Plan</b>                                                                                            | \$0                                     | \$0                                                       | maximum of \$25 per prescription                                                                | province first | yes | no | yes |
| 16 | age 65 with net income of ≤\$68,000                                                                                   |                                         |                                                           |                                                                                                 |                |     |    |     |
| 17 |                                                                                                                       |                                         |                                                           |                                                                                                 |                |     |    |     |
| 18 | • <b>Supplementary Health Program</b>                                                                                 | \$0                                     | \$0                                                       | \$2 per prescription                                                                            | province first | yes | no | yes |
| 19 |                                                                                                                       |                                         |                                                           |                                                                                                 |                |     |    |     |
| 20 | Yukon                                                                                                                 |                                         |                                                           |                                                                                                 |                |     |    |     |
| 21 | • <b>Chronic Disease and Disability Benefits Program</b>                                                              | \$0                                     | first \$250 of eligible costs per year (\$500 per family) | \$0                                                                                             | private first  | yes | no | yes |
| 22 | registered Yukon residents                                                                                            |                                         |                                                           |                                                                                                 |                |     |    |     |
| 23 |                                                                                                                       |                                         |                                                           |                                                                                                 |                |     |    |     |
| 24 | • <b>Pharmacare and Extended Health Benefits Program</b>                                                              | \$0                                     | \$0                                                       | \$0                                                                                             | private first  | yes | no | yes |
| 25 | registered residents age 65 or older or over 60 years of age and married to a Yukon resident who is 65 years or older |                                         |                                                           |                                                                                                 |                |     |    |     |
| 26 |                                                                                                                       |                                         |                                                           |                                                                                                 |                |     |    |     |
| 27 |                                                                                                                       |                                         |                                                           |                                                                                                 |                |     |    |     |
| 28 |                                                                                                                       |                                         |                                                           |                                                                                                 |                |     |    |     |
| 29 |                                                                                                                       |                                         |                                                           |                                                                                                 |                |     |    |     |

<sup>1</sup>Premium: the amount an individual must pay to be enrolled in the program

<sup>2</sup>Deductible: the amount that must be paid by the individual before the program pays for any part of the drug costs.

<sup>3</sup>Co-payment: the amount or portion an individual pays with each prescription filled.

<sup>4</sup>Registered residents are defined as residents with valid provincial/territorial health coverage

<sup>5</sup>all antiretroviral regimens must be authorized by a British Columbia Centre for Excellence physician before medications can be dispensed

<sup>6</sup>In Manitoba, an "adjusted total family income" is the total taxable income minus \$3,000 for each dependent under the age of 18

([www.gov.mb.ca/health/pharmacare/estimator.html](http://www.gov.mb.ca/health/pharmacare/estimator.html))

<sup>7</sup>In New Brunswick, a co-payment of 20% of the prescription to a max of \$20 or \$500/family unit/year with annual registration of \$50 is not collected

<sup>8</sup>On April 10, 2018, the government of Saskatchewan announced a change in their reimbursement policy to providing universal coverage for HIV medication to all registered residents. Data presented are those extracted in December 2017.



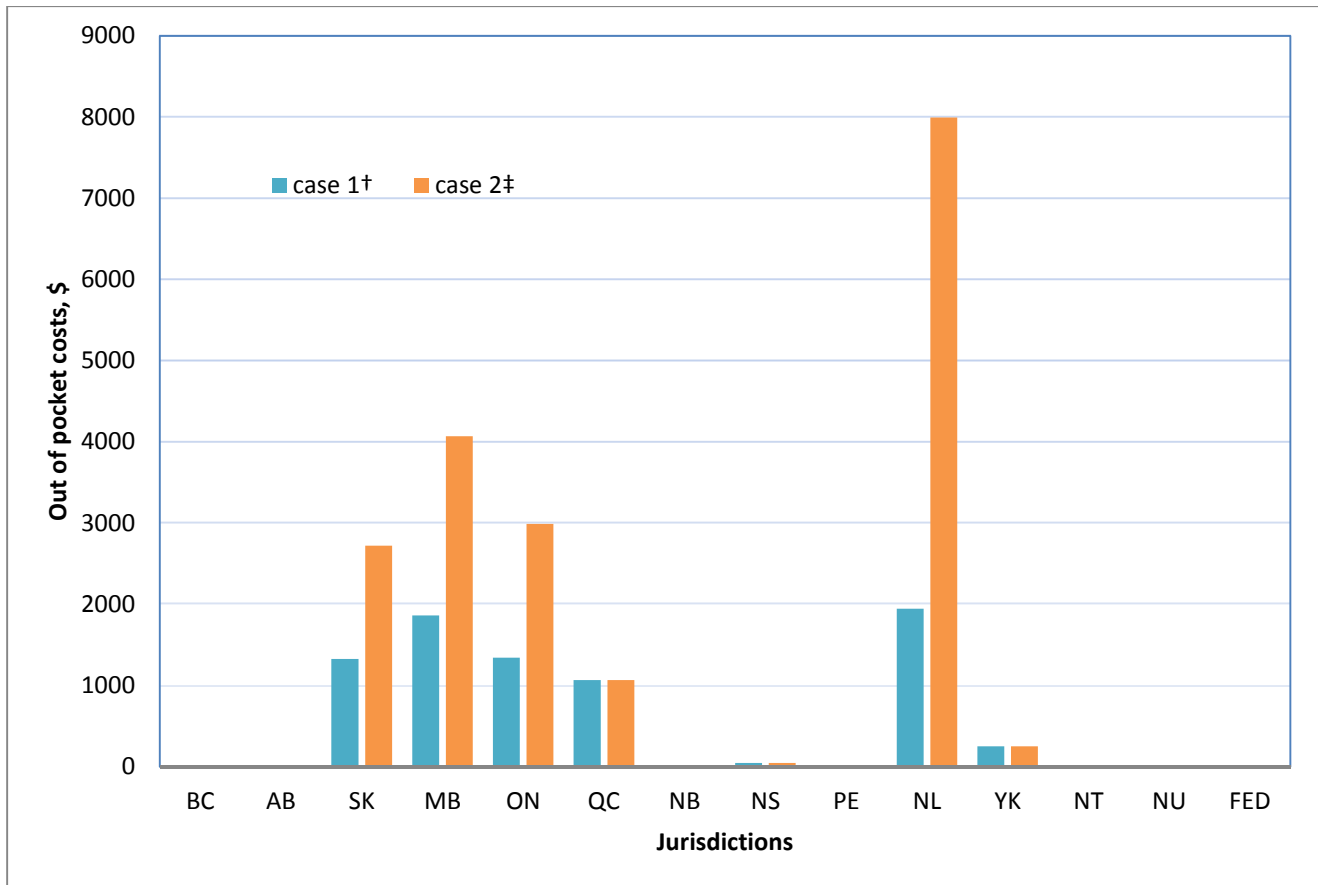

**Figure 1:** Estimated annual out-of-pocket costs to purchase single tablet abacavir/lamivudine/dolutegravir in each jurisdiction, excluding mark-ups and professional fees. The total annual cost of the antiretroviral regimen is \$15,552. BC = British Columbia, AB = Alberta, SK = Saskatchewan, MB = Manitoba, ON = Ontario, QC = Quebec, NB = New Brunswick, NS = Nova Scotia, PE = Prince Edward Island, NL = Newfoundland and Labrador, YK = Yukon, NT = Northwest Territories, NU = Nunavut, FED = federal programs.

†Case 1 is a single man with no dependents and annual income of \$39,000.

‡Case 2 is a married woman with two dependents and an annual net household income of \$80,000.

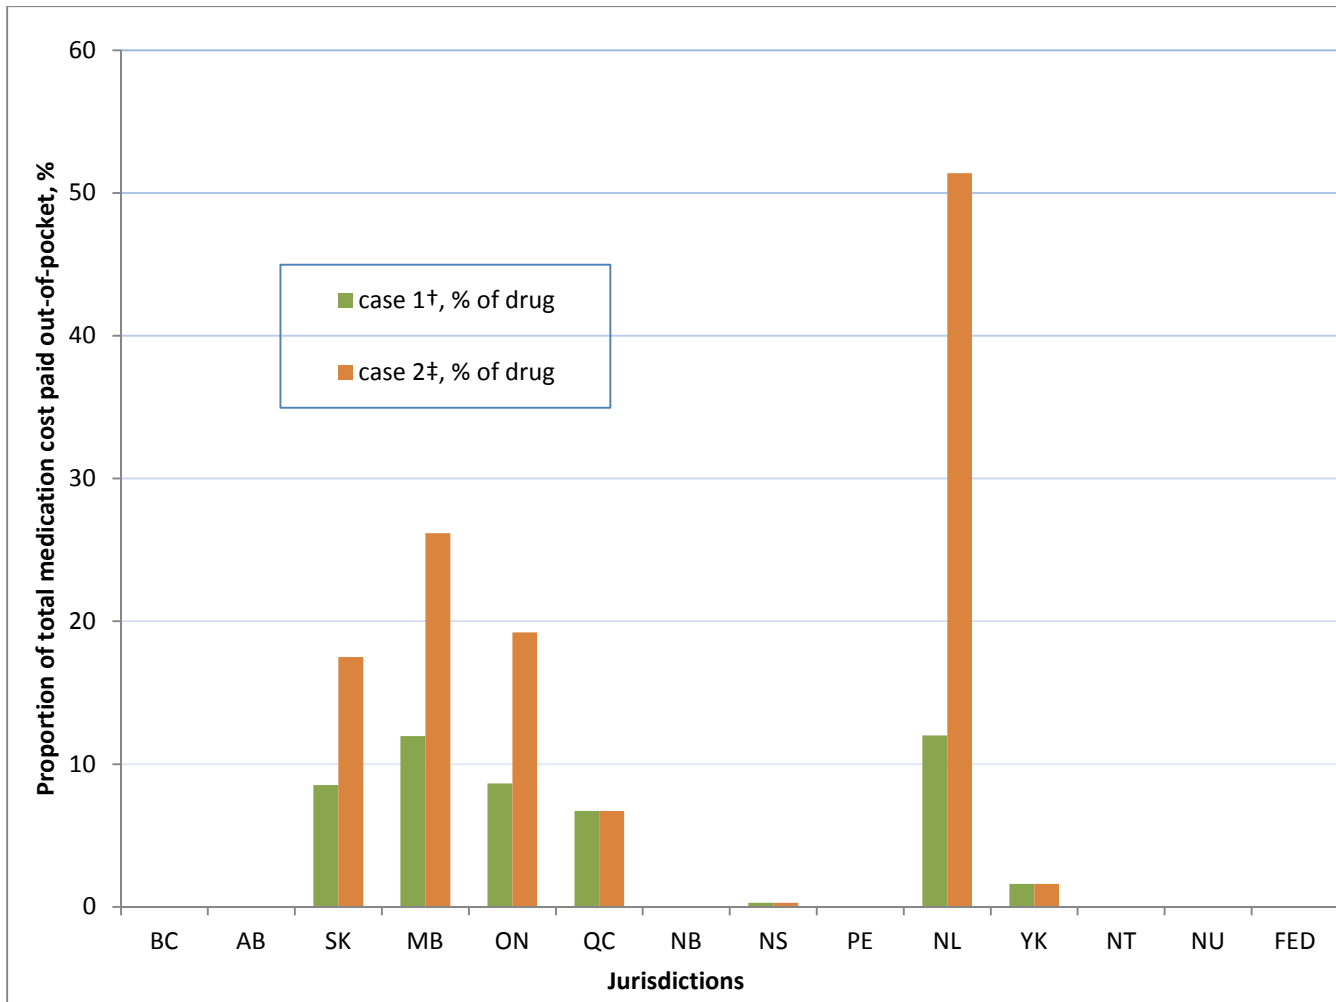

**Figure 2:** Proportion of annual cost of single tablet abacavir/lamivudine/dolutegravir paid out-of-pocket-pocket. The total annual cost of the antiretroviral regimen is \$15, 552. BC = British Columbia, AB = Alberta, SK= Saskatchewan, MB = Manitoba, ON = Ontario, QC = Quebec, NB = New Brunswick, NS = Nova Scotia, PE = Prince Edward Island, NL = Newfoundland and Labrador, YK = Yukon, NT = Northwest Territories, NU = Nunavut, FED = federal programs

†Case 1 is a single man with no dependents and annual income of \$39,000.

‡Case 2 is a married woman with two dependents and an annual net household income of \$80,000.

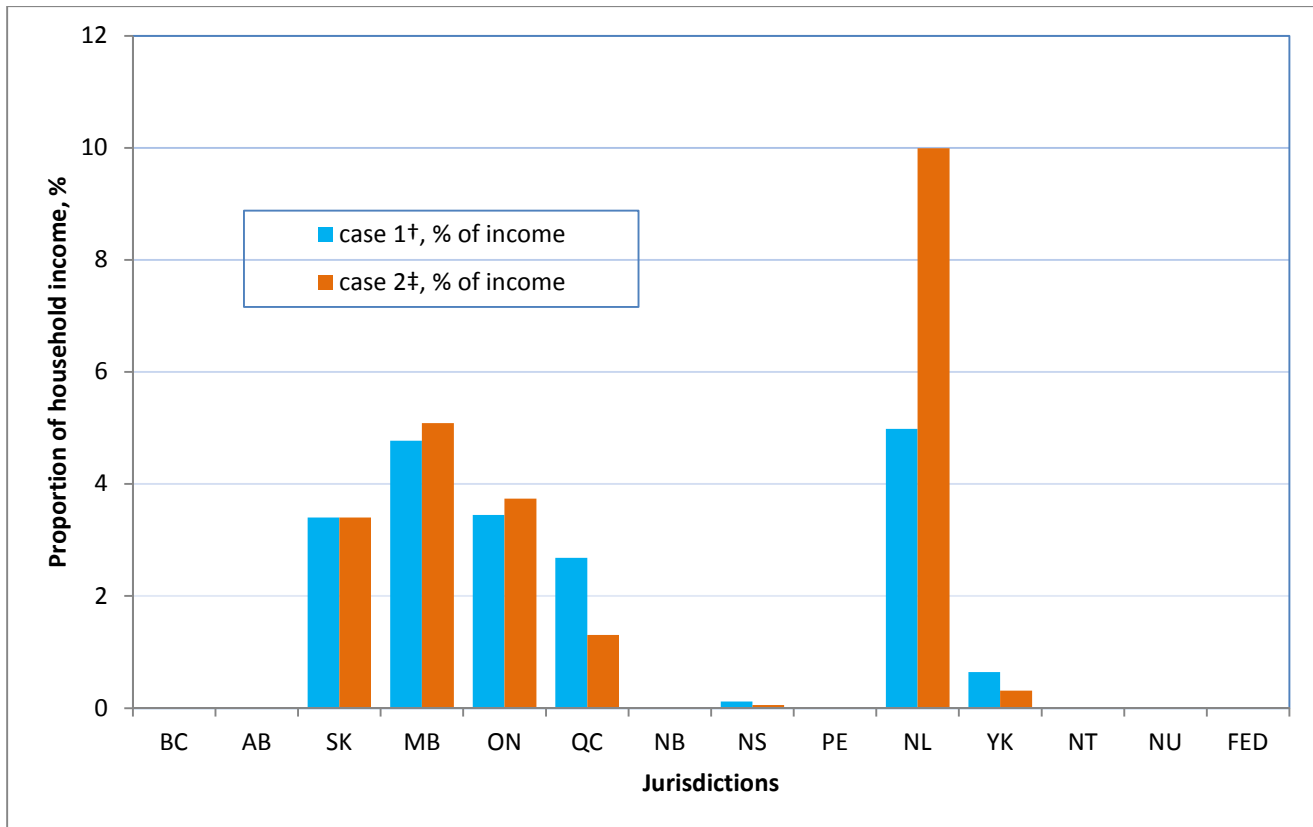

**Figure 3:** Proportion of household income needed to purchase single tablet abacavir/lamivudine/dolutegravir in each jurisdiction. The total annual cost of the antiretroviral regimen is \$15, 552. BC = British Columbia, AB = Alberta, SK= Saskatchewan, MB = Manitoba, ON = Ontario, QC = Quebec, NB = New Brunswick, NS = Nova Scotia, PE = Prince Edward Island, NL = Newfoundland and Labrador, YK = Yukon, NT = Northwest Territories, NU = Nunavut, FED = federal programs

†Case 1 is a single man with no dependents and annual income of \$39,000.

‡Case 2 is a married woman with two dependents and an annual net household income of \$80,000.

## Appendix 1. Provincial, Territorial and Federal health ministries in Canada

| Jurisdiction                                   | Health ministry                                                       | Website                                                                                                                                                                                                                                                                                                                             |
|------------------------------------------------|-----------------------------------------------------------------------|-------------------------------------------------------------------------------------------------------------------------------------------------------------------------------------------------------------------------------------------------------------------------------------------------------------------------------------|
| Federal*                                       |                                                                       |                                                                                                                                                                                                                                                                                                                                     |
| Non-Insured Health Benefit Program             | First Nations and Inuit Health                                        | <a href="https://www.canada.ca/en/indigenous-services-canada/services/non-insured-health-benefits-first-nations-inuit.html">https://www.canada.ca/en/indigenous-services-canada/services/non-insured-health-benefits-first-nations-inuit.html</a>                                                                                   |
| Interim Federal Health Program                 | Interim Federal Health Program                                        | <a href="https://www.canada.ca/en/immigration-refugees-citizenship/services/refugees/help-within-canada/health-care/interim-federal-health-program/eligibility.html">https://www.canada.ca/en/immigration-refugees-citizenship/services/refugees/help-within-canada/health-care/interim-federal-health-program/eligibility.html</a> |
| Veteran Affairs Canada                         | Veteran Affairs Canada                                                | <a href="http://www.veterans.gc.ca/eng/services/health/treatment-benefits">http://www.veterans.gc.ca/eng/services/health/treatment-benefits</a>                                                                                                                                                                                     |
| Correctional Service Canada                    | Correctional Service Canada Health Services                           | <a href="http://www.csc-scc.gc.ca/health/index-eng.shtml">http://www.csc-scc.gc.ca/health/index-eng.shtml</a>                                                                                                                                                                                                                       |
| National Defence and the Canadian Armed Forces | Canadian Forces Health Services                                       | <a href="http://www.forces.gc.ca/en/caf-community-health-services/index.page">http://www.forces.gc.ca/en/caf-community-health-services/index.page</a>                                                                                                                                                                               |
| Province/Territory                             |                                                                       |                                                                                                                                                                                                                                                                                                                                     |
| Alberta                                        | Alberta Health                                                        | <a href="http://www.health.alberta.ca/">www.health.alberta.ca/</a>                                                                                                                                                                                                                                                                  |
| British Columbia                               | British Columbia Ministry of Health                                   | <a href="http://www2.gov.bc.ca/gov/content/health">www2.gov.bc.ca/gov/content/health</a>                                                                                                                                                                                                                                            |
| Manitoba                                       | Manitoba Health, Seniors and Active Living                            | <a href="https://www.gov.mb.ca/health/index.html">https://www.gov.mb.ca/health/index.html</a>                                                                                                                                                                                                                                       |
| New Brunswick                                  | New Brunswick Department of Health                                    | <a href="https://www2.gnb.ca/content/gnb/en/departments/health.html">https://www2.gnb.ca/content/gnb/en/departments/health.html</a>                                                                                                                                                                                                 |
| Newfoundland and Labrador                      | Newfoundland and Labrador Department of Health and Community Services | <a href="https://www.gov.nl.ca/health-and-wellness/">https://www.gov.nl.ca/health-and-wellness/</a>                                                                                                                                                                                                                                 |
| Northwest Territories                          | Northwest Territories Health and Social Services                      | <a href="https://www.hss.gov.nt.ca/en">https://www.hss.gov.nt.ca/en</a>                                                                                                                                                                                                                                                             |
| Nova Scotia                                    | Nova Scotia Department of Health and Wellness                         | <a href="https://novascotia.ca/DHW/">https://novascotia.ca/DHW/</a>                                                                                                                                                                                                                                                                 |
| Nunavut                                        | Nunavut Department of Health                                          | <a href="https://www.gov.nu.ca/health">https://www.gov.nu.ca/health</a>                                                                                                                                                                                                                                                             |
| Ontario                                        | Ontario Ministry of Health and Long-Term Care                         | <a href="http://www.health.gov.on.ca/en/">http://www.health.gov.on.ca/en/</a>                                                                                                                                                                                                                                                       |
| Prince Edward Island                           | Health PEI                                                            | <a href="https://www.princeedwardisland.ca/en/topic/health-pei">https://www.princeedwardisland.ca/en/topic/health-pei</a>                                                                                                                                                                                                           |
| Quebec                                         | Quebec Department of Health and Social Services                       | <a href="http://www4.gouv.qc.ca/EN/Portail/Citoyens/ServicesEnLigne/Pages/SanteServicesSociaux.aspx">http://www4.gouv.qc.ca/EN/Portail/Citoyens/ServicesEnLigne/Pages/SanteServicesSociaux.aspx</a>                                                                                                                                 |
| Saskatchewan                                   | Saskatchewan Ministry of Health                                       | <a href="https://www.saskatchewan.ca/government/government-structure/ministries/health">https://www.saskatchewan.ca/government/government-structure/ministries/health</a>                                                                                                                                                           |
| Yukon                                          | Yukon Health and Social Services                                      | <a href="http://www.hss.gov.yk.ca/">http://www.hss.gov.yk.ca/</a>                                                                                                                                                                                                                                                                   |

\*Federal programs that insure specific populations

**Appendix 2. Data collection form for all federal, provincial and territorial public plans that cover antiretrovirals for adults and seniors**

| Name of all public drug program available to cover antiretrovirals | Cost sharing requirements        |                                     |                                     |                                                                       | Any restrictions? |                     | Does the plan cover non-HIV related drugs? |
|--------------------------------------------------------------------|----------------------------------|-------------------------------------|-------------------------------------|-----------------------------------------------------------------------|-------------------|---------------------|--------------------------------------------|
|                                                                    | Premium yes/no? amount? maximum? | Deductible yes/no? amount? maximum? | Co-payment yes/no? amount? maximum? | Co-ordination with other payers yes/no? who is 1 <sup>st</sup> payer? | prescriber        | Dispensing pharmacy |                                            |
| Name of jurisdiction:                                              |                                  |                                     |                                     |                                                                       |                   |                     |                                            |
| What is the plan name and eligibility criteria for:                |                                  |                                     |                                     |                                                                       |                   |                     |                                            |
| a. general population?                                             |                                  |                                     |                                     |                                                                       |                   |                     |                                            |
| b. social assistance?                                              |                                  |                                     |                                     |                                                                       |                   |                     |                                            |
| c. seniors (over age 65)                                           |                                  |                                     |                                     |                                                                       |                   |                     |                                            |

<sup>1</sup>*Premium*: the amount an individual must pay to be enrolled in the program

<sup>2</sup>*Deductible*: the amount that must be paid by the individual before the program pays for any part of the drug costs.

<sup>3</sup>*Co-payment*: the amount or portion an individual pays with each prescription filled.

**Appendix 3.** Calculation of annual out-of-pocket expenses for ARV regimen<sup>1</sup>, December 2017

| Jurisdiction                                                                                                                                                                        | Clinical scenario 1:<br>Single man earning after tax income of \$39,000/year purchasing regimen that costs \$15,552 annually (\$1296/month) |                                   |                                                                                     |                                                                                                               | Clinical scenario 2:<br>Married female with 2 children earning after tax household income of \$80,000 purchasing a regimen that costs \$15552 annually (\$1296/month) |                                   |                                                                                     |                                                                                                               |
|-------------------------------------------------------------------------------------------------------------------------------------------------------------------------------------|---------------------------------------------------------------------------------------------------------------------------------------------|-----------------------------------|-------------------------------------------------------------------------------------|---------------------------------------------------------------------------------------------------------------|-----------------------------------------------------------------------------------------------------------------------------------------------------------------------|-----------------------------------|-------------------------------------------------------------------------------------|---------------------------------------------------------------------------------------------------------------|
|                                                                                                                                                                                     | Premium                                                                                                                                     | Deductible                        | Co-payment                                                                          | Total costs (premium + deductible + co-payment), \$                                                           | Premium                                                                                                                                                               | Deductible                        | Co-payment                                                                          | Total costs, (premium + deductible + co-payment), \$                                                          |
| Alberta                                                                                                                                                                             | 0                                                                                                                                           | 0                                 | 0                                                                                   | 0                                                                                                             | 0                                                                                                                                                                     | 0                                 | 0                                                                                   | 0                                                                                                             |
| British Columbia                                                                                                                                                                    | 0                                                                                                                                           | 0                                 | 0                                                                                   | 0                                                                                                             |                                                                                                                                                                       |                                   |                                                                                     |                                                                                                               |
| Manitoba                                                                                                                                                                            | 0                                                                                                                                           | 39,000x4.79% = 1868               | 0                                                                                   | 1868 <sup>2</sup>                                                                                             | 0                                                                                                                                                                     | (80,000-6000) x 5.5% = 4070       | 0                                                                                   | 4070 <sup>2</sup>                                                                                             |
| New Brunswick                                                                                                                                                                       | 0                                                                                                                                           | 0                                 | 0                                                                                   | 0                                                                                                             | 0                                                                                                                                                                     | 0                                 | 0                                                                                   | 0                                                                                                             |
| Newfoundland and Labrador                                                                                                                                                           | 0                                                                                                                                           | 0                                 | Co-payment rate = 39,000 x 5% ÷ 15,552 = 12.5%<br>Co-payment = 12.5% x 15552 = 1944 | 1944                                                                                                          | 0                                                                                                                                                                     | 0                                 | Co-payment rate = 80,000 x 10% ÷ 15,552 = 51.4%<br>Copayment = 51.4% x 15552 = 7993 | 7993                                                                                                          |
| Northwest Territories                                                                                                                                                               | 0                                                                                                                                           | 0                                 | 0                                                                                   | 0                                                                                                             | 0                                                                                                                                                                     | 0                                 | 0                                                                                   | 0                                                                                                             |
| Nova Scotia                                                                                                                                                                         | 0                                                                                                                                           | 0                                 | 4x11.25 = 45                                                                        | 45                                                                                                            | 0                                                                                                                                                                     | 0                                 | 4x11.25 = 45                                                                        | 45                                                                                                            |
| Nunavut                                                                                                                                                                             | 0                                                                                                                                           | 0                                 | 0                                                                                   | 0                                                                                                             | 0                                                                                                                                                                     | 0                                 | 0                                                                                   | 0                                                                                                             |
| Ontario                                                                                                                                                                             | 0                                                                                                                                           | 39,000x3.446% = 1344 <sup>3</sup> | 4x2=8                                                                               | 1352                                                                                                          | 0                                                                                                                                                                     | 80,000x3.736% = 2989 <sup>3</sup> | 4x2=8                                                                               | 2997                                                                                                          |
| Prince Edward Island                                                                                                                                                                | 0                                                                                                                                           | 0                                 | 0                                                                                   | 0                                                                                                             | 0                                                                                                                                                                     | 0                                 | 0                                                                                   | 0                                                                                                             |
| Quebec                                                                                                                                                                              | 0-677                                                                                                                                       | \$19.45                           | (1296 – 19.45) x 34.8% = 463.69                                                     | 1066 + premium<br><br>Yearly maximum of \$1066 used as monthly value exceeds monthly maximum of \$88.83/month | 0-677                                                                                                                                                                 | \$19.45                           | (1296 – 19.45) x 34.8% = 463.69                                                     | 1066 + premium<br><br>Yearly maximum of \$1066 used as monthly value exceeds monthly maximum of \$88.83/month |
| Saskatchewan <sup>4</sup>                                                                                                                                                           | 0                                                                                                                                           | 39,000x3.4% = 1326                | 0                                                                                   | 1326 <sup>2</sup>                                                                                             | 0                                                                                                                                                                     | 80,000x3.4% = 2720                | 0                                                                                   | 2720 <sup>2</sup>                                                                                             |
| Yukon                                                                                                                                                                               | 0                                                                                                                                           | 250                               | 0                                                                                   | 250                                                                                                           | 0                                                                                                                                                                     | 250                               | 0                                                                                   | 250                                                                                                           |
| Federal Programs<br><br>(Non-insured health Benefit program, Interim Federal health program, Verteran Affairs Canada, Correctional Service Canada, Canadian Forces Health Services) | 0                                                                                                                                           | 0                                 | 0                                                                                   | 0                                                                                                             | 0                                                                                                                                                                     | 0                                 | 0                                                                                   | 0                                                                                                             |

<sup>1</sup>ARV regimen = antiretroviral regimen consisting of the single co-formulated tablet abacavir/lamivudine/dolutegravir<sup>2</sup>Total cost is underestimated as deductible was calculated with after tax income rather than using taxable income as required by provincial program<sup>3</sup>Deductible determined from grid in "A Guide to Understanding the Trillium Drug Program", Queen's Printer for Ontario, 2013.<sup>4</sup>On April 10, 2018, the government of Saskatchewan announced a change in their reimbursement policy to provide universal coverage for HIV medications to all registered residents. Data presented are those extracted in December 2017
