# Supplementary material
Source: PubMed Central journal article supplement (PMC6276936)
Supplement: supp_6.4.E551_strobe-statement.pdf [file supp_6.4.E551_strobe-statement.pdf]

Public prescription drug plan coverage for antiretrovirals and the potential cost to persons living with HIV in Canada: a descriptive study

STROBE Statement—checklist

|                              | Item No | Recommendation                                                                                                                                                                       | Reported                                                                                    |
|------------------------------|---------|--------------------------------------------------------------------------------------------------------------------------------------------------------------------------------------|---------------------------------------------------------------------------------------------|
| <b>Title and abstract</b>    | 1       | (a) Indicate the study’s design with a commonly used term in the title or the abstract                                                                                               | Title and Abstract                                                                          |
|                              |         | (b) Provide in the abstract an informative and balanced summary of what was done and what was found                                                                                  | Abstract                                                                                    |
| <b>Introduction</b>          |         |                                                                                                                                                                                      |                                                                                             |
| Background/rationale         | 2       | Explain the scientific background and rationale for the investigation being reported                                                                                                 | Introduction<br>Page 2                                                                      |
| Objectives                   | 3       | State specific objectives, including any prespecified hypotheses                                                                                                                     | Introduction<br>Page 2                                                                      |
| <b>Methods</b>               |         |                                                                                                                                                                                      |                                                                                             |
| Study design                 | 4       | Present key elements of study design early in the paper                                                                                                                              | Methods<br>Page 3                                                                           |
| Setting                      | 5       | Describe the setting, locations, and relevant dates, including periods of recruitment, exposure, follow-up, and data collection                                                      | Methods<br>Page 3, Appendix 2                                                               |
| Participants                 | 6       | Give the eligibility criteria, and the sources and methods of selection of participants                                                                                              | Methods<br>Page 3                                                                           |
| Variables                    | 7       | Clearly define all outcomes, exposures, predictors, potential confounders, and effect modifiers. Give diagnostic criteria, if applicable                                             | Methods<br>Page 3, 4<br>Appendix 2                                                          |
| Data sources/<br>measurement | 8*      | For each variable of interest, give sources of data and details of methods of assessment (measurement). Describe comparability of assessment methods if there is more than one group | Methods<br>Page 3, 4                                                                        |
| Bias                         | 9       | Describe any efforts to address potential sources of bias                                                                                                                            | Methods<br>Page 3, 4                                                                        |
| Study size                   | 10      | Explain how the study size was arrived at                                                                                                                                            | Methods (based on number of drug plans that provide coverage for antiretrovirals)<br>Page 3 |
| Quantitative variables       | 11      | Explain how quantitative variables were handled in the analyses. If applicable, describe which groupings were chosen and why                                                         | Methods<br>Page 3                                                                           |
| Statistical methods          | 12      | (a) Describe all statistical methods, including those used to control for confounding                                                                                                | Not applicable                                                                              |
|                              |         | (b) Describe any methods used to examine subgroups and interactions                                                                                                                  | Not applicable                                                                              |
|                              |         | (c) Explain how missing data were addressed                                                                                                                                          | Not applicable                                                                              |
|                              |         | d) Describe analytical methods taking account of sampling                                                                                                                            | Not applicable                                                                              |

strategy

(e) Describe any sensitivity analyses

Not applicable

## Results

|                          |     |                                                                                                                                                                                                              |                                            |
|--------------------------|-----|--------------------------------------------------------------------------------------------------------------------------------------------------------------------------------------------------------------|--------------------------------------------|
| Participants             | 13* | (a) Report numbers of individuals at each stage of study—eg numbers potentially eligible, examined for eligibility, confirmed eligible, included in the study, completing follow-up, and analysed            | Not applicable                             |
|                          |     | (b) Give reasons for non-participation at each stage                                                                                                                                                         | Not applicable                             |
|                          |     | (c) Consider use of a flow diagram                                                                                                                                                                           | Not applicable                             |
| Descriptive data         | 14* | (a) Give characteristics of study participants (eg demographic, clinical, social) and information on exposures and potential confounders                                                                     | Tables 1 and 2                             |
|                          |     | (b) Indicate number of participants with missing data for each variable of interest                                                                                                                          | Not applicable                             |
| Outcome data             | 15* | Report numbers of outcome events or summary measures                                                                                                                                                         | Results<br>Page 4, Figure 1,<br>Appendix 3 |
| Main results             | 16  | (a) Give unadjusted estimates and, if applicable, confounder-adjusted estimates and their precision (eg, 95% confidence interval). Make clear which confounders were adjusted for and why they were included | Not applicable                             |
|                          |     | (b) Report category boundaries when continuous variables were categorized                                                                                                                                    | Not applicable                             |
|                          |     | (c) If relevant, consider translating estimates of relative risk into absolute risk for a meaningful time period                                                                                             | Not applicable                             |
| Other analyses           | 17  | Report other analyses done—eg analyses of subgroups and interactions, and sensitivity analyses                                                                                                               | Results<br>Page 5                          |
| <b>Discussion</b>        |     |                                                                                                                                                                                                              |                                            |
| Key results              | 18  | Summarise key results with reference to study objectives                                                                                                                                                     | Discussion<br>Page 6                       |
| Limitations              | 19  | Discuss limitations of the study, taking into account sources of potential bias or imprecision. Discuss both direction and magnitude of any potential bias                                                   | Limitations<br>Page 7,8                    |
| Interpretation           | 20  | Give a cautious overall interpretation of results considering objectives, limitations, multiplicity of analyses, results from similar studies, and other relevant evidence                                   | Discussion<br>Page 6-8                     |
| Generalisability         | 21  | Discuss the generalisability (external validity) of the study results                                                                                                                                        | Limitations<br>Page 6,7                    |
| <b>Other information</b> |     |                                                                                                                                                                                                              |                                            |
| Funding                  | 22  | Give the source of funding and the role of the funders for the present study and, if applicable, for the original study on which the present article is based                                                | Competing interest<br>statement            |
